# Supplementary material for: Propofol Target-Controlled Infusion in Emergency Department Sedation (ProTEDS): a multicentre, single-arm feasibility study
Source: HighWire-hosted journal article supplement (doi:10.1136/emermed-2020-209686), 2020-12-09
Supplement: emermed-2020-209686supp002_data_supplement.pdf [file emermed-2020-209686supp002_data_supplement.pdf]

## Supplementary File 2

## Target-Controlled Infusion Sedation Flow Sheet (V1)

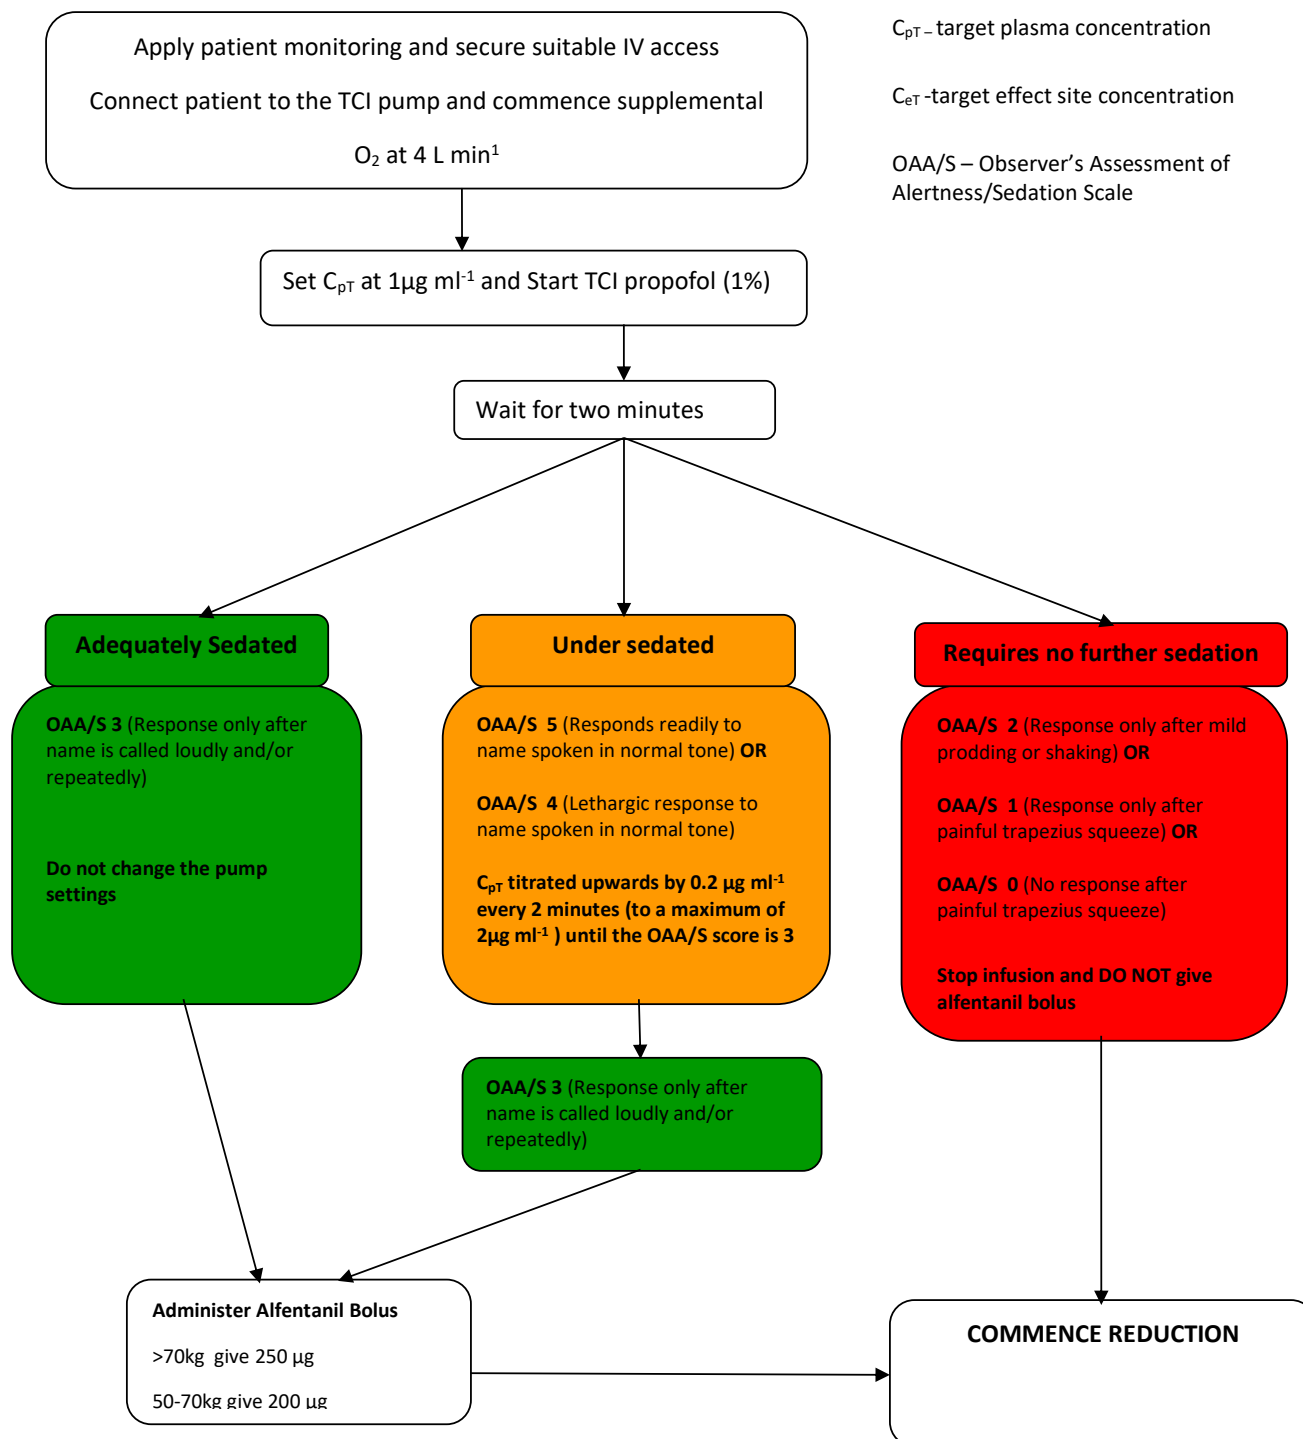

On completion of the reduction the infusion should be stopped and the patient observed until complete recovery

If an adverse event occurs, the TCI should be stopped immediately
